# Supplementary material for: Synthesis, Structure, and Properties of EuLnCuSe3 (Ln = Nd, Sm, Gd, Er)
Source: MDPI journal article supplement (doi:10.3390/cryst12010017), 2021-12-23
Supplement: s1 [file s1]

# Synthesis, Structure, and Properties of EuLnCuSe<sub>3</sub> (Ln = Nd, Sm, Gd, Er)

Oleg V. Andreev <sup>1</sup>, Victor V. Atuchin <sup>2,3,4</sup>, Alexander S. Aleksandrovsky <sup>5,6</sup>, Yuriy G. Denisenko <sup>7,\*</sup>, Boris A. Zakharov <sup>8,9</sup>, Alexander P. Tyutyunnik <sup>10</sup>, Navruzbek N. Habibullayev <sup>1</sup>, Dmitriy A. Velikanov <sup>5</sup>, Dmitriy A. Ulybin <sup>1,9</sup> and Daniil D. Shpindyuk <sup>1</sup>

- <sup>1</sup> Institute of Chemistry, University of Tyumen, 625003 Tyumen, Russia; o.v.andreev@utmn.ru (O.V.A.); habibullayev\_navruzbek@mail.ru (N.N.H.); d.a.ulybin@mail.ru (D.A.U.); d.d.shpindyuk@utmn.ru (D.D.S.)
- <sup>2</sup> Laboratory of Optical Materials and Structures, Institute of Semiconductor Physics, SB RAS, 630090 Novosibirsk, Russia; atuchin@isp.nsc.ru
- <sup>3</sup> Research and Development Department, Kemerovo State University, 650000 Kemerovo, Russia
- <sup>4</sup> Department of Industrial Machinery Design, Novosibirsk State Technical University, 630073 Novosibirsk, Russia
- <sup>5</sup> Kirensky Institute of Physics, Federal Research Center KSC SB RAS, 660036 Krasnoyarsk, Russia; aleksandrovsky@kirensky.ru (A.S.A.); dpona1@gmail.com (D.A.V.)
- <sup>6</sup> Department of Photonics and Laser Technology, Siberian Federal University, Krasnoyarsk, Russia
- <sup>7</sup> Department of General and Special Chemistry, Industrial University of Tyumen, 625000 Tyumen, Russia
- <sup>8</sup> Borekov Institute of Catalysis SB RAS, 630090 Novosibirsk, Russia;
- <sup>9</sup> Laboratory of Molecular Design and Ecologically Safe Technologies, Novosibirsk State University, 630090 Novosibirsk, Russia
- <sup>10</sup> Institute of Solid State Chemistry, UB RAS, 620990 Ekaterinburg, Russia; tyutyunnik@ihim.uran.ru (A.P.T.)
- \* Correspondence: Correspondence: yu.g.denisenko@gmail.com (Y.G.D)

## Supporting information

**Table S1.** Coordinates of atoms in the EuErCuSe<sub>3</sub> compound.

| Atom label | x   | Y           | z           |
|------------|-----|-------------|-------------|
| Cu1        | 0   | 0.4710(2)   | 0.75        |
| Er1        | 0.5 | 0.500000    | 0.5         |
| Eu1        | 0   | 0.75105(9)  | 0.75        |
| Se1        | 0   | 0.35964(11) | 0.56416(15) |
| Se2        | 0.5 | 0.57885(15) | 0.75        |

**Table S2.** Bond lengths in EuErCuSe<sub>3</sub> structure.

|                        |                  |                         |                    |
|------------------------|------------------|-------------------------|--------------------|
| <b>Cu1—Se1</b>         | <b>2.448 (2)</b> | <b>Er1—Se1</b>          | <b>2.8420 (10)</b> |
| Cu1—Se1 <sup>i</sup>   | 2.448 (2)        | Er1—Se1 <sup>vii</sup>  | 2.8420 (10)        |
| Cu1—Se2                | 2.487 (2)        | Er1—Se1 <sup>viii</sup> | 2.8420 (10)        |
| Cu1—Se2 <sup>ii</sup>  | 2.487 (2)        | Er1—Se1 <sup>ix</sup>   | 2.8420 (10)        |
| Cu1—Er1 <sup>iii</sup> | 3.3316 (4)       | Eu1—Se2 <sup>ii</sup>   | 3.0662 (18)        |
| Cu1—Er1 <sup>ii</sup>  | 3.3316 (4)       | Eu1—Se2                 | 3.0662 (18)        |
| Cu1—Er1 <sup>iv</sup>  | 3.3316 (4)       | Eu1—Se1 <sup>x</sup>    | 3.1614 (13)        |
| Cu1—Er1                | 3.3316 (4)       | Eu1—Se1 <sup>xi</sup>   | 3.1614 (13)        |
| Cu1—Eu1 <sup>v</sup>   | 3.570 (2)        | Eu1—Se1 <sup>xii</sup>  | 3.1614 (13)        |
| Cu1—Eu1 <sup>vi</sup>  | 3.570 (2)        | Eu1—Se1 <sup>xiii</sup> | 3.1614 (13)        |
| Cu1—Eu1                | 3.740 (3)        | Eu1—Se1 <sup>viii</sup> | 3.6035 (16)        |
| Er1—Se2 <sup>vii</sup> | 2.8192 (8)       | Eu1—Se1 <sup>iv</sup>   | 3.6035 (16)        |
| Er1—Se2                | 2.8192 (8)       | Eu1—Eu1 <sup>ii</sup>   | 4.0555 (3)         |

Symmetry code(s): (i) x, y, -z+3/2; (ii) x-1, y, z; (iii) -x+1, -y+1, z+1/2; (iv) -x, -y+1, z+1/2; (v) x-1/2, y-1/2, z; (vi) x+1/2, y-1/2, z; (vii) -x+1, -y+1, -z+1; (viii) -x, -y+1, -z+1; (ix) x+1, y, z; (x) x+1/2, y+1/2, -z+3/2; (xi) x-1/2, y+1/2, z; (xii) x-1/2, y+1/2, -z+3/2; (xiii) x+1/2, y+1/2, z.
